# Supplementary material for: Regional seesaw between North Atlantic and Nordic Seas during the last glacial abrupt climate events
Source: Copernicus journal article supplement (doi:10.5194/cp-2017-14), 2017-02-13
Supplement: Supplementary file 2 [file cp-2017-14-supplement.zip]

**Table S2.** Age constrains for each of the studied cores.

| Core      | Level /Interval dated (cm) | Uncor-rected AMS <sup>14</sup> C ages * | Error (+/-) yr | Dated material or event based stratigraphy | Lab. id. ** | Calendar age (yr) | Calendar age reference                       |
|-----------|----------------------------|-----------------------------------------|----------------|--------------------------------------------|-------------|-------------------|----------------------------------------------|
| MD95-2009 | 0                          | <b>5010</b>                             | 70             | <i>N. pachyderma</i> (s)                   | ?           | <b>5366</b>       | Calib 7.1.0 / Marine13 (Reimer et al., 2013) |
| MD95-2009 | 50                         | <b>8640</b>                             | 100            | <i>N. pachyderma</i> (s)                   | ?           | <b>9305</b>       | Calib 7.1.0 / Marine13 (Reimer et al., 2013) |
| MD95-2009 | 120                        | <b>10930</b>                            | 100            | <i>N. pachyderma</i> (s)                   | ?           | <b>12367</b>      | Calib 7.1.0 / Marine13 (Reimer et al., 2013) |
| MD95-2009 | 280                        | <b>14590</b>                            | 130            | <i>N. pachyderma</i> (s)                   | ?           | <b>17270,5</b>    | Calib 7.1.0 / Marine13 (Reimer et al., 2013) |
| MD95-2009 | 330                        | <b>15420</b>                            | 130            | <i>N. pachyderma</i> (s)                   | ?           | <b>18241</b>      | Calib 7.1.0 / Marine13 (Reimer et al., 2013) |
| MD95-2009 | 360                        | <b>16720</b>                            | 140            | <i>N. pachyderma</i> (s)                   | ?           | <b>19707,5</b>    | Calib 7.1.0 / Marine13 (Reimer et al., 2013) |
| MD95-2009 | 390                        | <b>18760</b>                            | 160            | <i>N. pachyderma</i> (s)                   | ?           | <b>22213</b>      | Calib 7.1.0 / Marine13 (Reimer et al., 2013) |
| MD95-2009 | 430                        | <b>21760</b>                            | 200            | <i>N. pachyderma</i> (s)                   | ?           | <b>25687</b>      | Calib 7.1.0 / Marine13 (Reimer et al., 2013) |
| MD95-2009 | 510                        | <b>24360</b>                            | 230            | <i>N. pachyderma</i> (s)                   | ?           | <b>28007,5</b>    | Calib 7.1.0 / Marine13 (Reimer et al., 2013) |
| MD95-2009 | 527                        |                                         |                | GI4 termination (duration 0.3 ka)          |             | <b>28550</b>      | (Wolff et al., 2010) (GICC05 age scale)      |
| MD95-2009 | 539                        |                                         |                | GI4 onset                                  |             | <b>28850</b>      | (Wolff et al., 2010) (GICC05 age scale)      |
| MD95-2009 | 580                        | <b>27930</b>                            | 290            | <i>N. pachyderma</i> (s)                   | ?           | <b>31332</b>      | Calib 7.1.0 / Marine13 (Reimer et al., 2013) |
| MD95-2009 | 611                        |                                         |                | GI5 termination (duration 0.5 ka)          |             | <b>31950</b>      | (Wolff et al., 2010) (GICC05 age scale)      |
| MD95-2009 | 630                        |                                         |                | GI5 onset                                  |             | <b>32450</b>      | (Wolff et al., 2010) (GICC05 age scale)      |
| MD95-2009 | 642                        |                                         |                | GI6 termination (duration 0.4 ka)          |             | <b>33290</b>      | (Wolff et al., 2010) (GICC05 age scale)      |
| MD95-2009 | 665                        |                                         |                | GI6 onset                                  |             | <b>33690</b>      | (Wolff et al., 2010) (GICC05 age scale)      |
| MD95-2009 | 688                        |                                         |                | GI7 termination (duration 0.7 ka)          |             | <b>34730</b>      | (Wolff et al., 2010) (GICC05 age scale)      |
| MD95-2009 | 720                        |                                         |                | GI7 onset                                  |             | <b>35430</b>      | (Wolff et al., 2010) (GICC05 age scale)      |
| MD95-2009 | 756                        |                                         |                | GI8 termination (duration 1.6 ka)          |             | <b>36570</b>      | (Wolff et al., 2010) (GICC05 age scale)      |
| MD95-2009 | 805                        |                                         |                | GI8 onset                                  |             | <b>38170</b>      | (Wolff et al., 2010) (GICC05 age scale)      |
| MD95-2009 | 847                        |                                         |                | GI9 termination (duration 0.3 ka)          |             | <b>39810</b>      | (Wolff et al., 2010) (GICC05 age scale)      |
| MD95-2009 | 858                        |                                         |                | GI9 onset                                  |             | <b>40110</b>      | (Wolff et al., 2010) (GICC05 age scale)      |
| MD95-2009 | 876                        |                                         |                | GI10 termination (duration 0.7 ka)         |             | <b>40710</b>      | (Wolff et al., 2010) (GICC05 age scale)      |
| MD95-2009 | 900                        |                                         |                | GI10 onset                                 |             | <b>41410</b>      | (Wolff et al., 2010) (GICC05 age scale)      |
| MD95-2009 | 915                        |                                         |                | GI11 termination (duration 1 ka)           |             | <b>42290</b>      | (Wolff et al., 2010) (GICC05 age scale)      |
| MD95-2009 | 942                        |                                         |                | GI11 onset                                 |             | <b>43290</b>      | (Wolff et al., 2010) (GICC05 age scale)      |
| MD95-2009 | 966                        |                                         |                | GI12 termination (duration 2,6 ka)         |             | <b>44210</b>      | (Wolff et al., 2010) (GICC05 age scale)      |
| MD95-2009 | 1030                       |                                         |                | GI12 onset                                 |             | <b>46810</b>      | (Wolff et al., 2010) (GICC05 age scale)      |
| MD95-2009 | 1102                       |                                         |                | GI13 onset                                 |             | <b>49230</b>      | (Wolff et al., 2010) (GICC05 age scale)      |
| MD95-2009 | 1160                       |                                         |                | GI14 onset                                 |             | <b>54170</b>      | (Wolff et al., 2010) (GICC05 age scale)      |
| MD95-2010 | 34-35                      | <b>10700</b>                            |                | Vedde ash – base                           |             | <b>12121</b>      | (Rasmussen et al., 2006) (GICC05 age scale)  |
| MD95-2010 | 54-55                      | <b>11415</b>                            | 55             | ?                                          | KIA 6551    | <b>12867</b>      | Calib 7.1.0 / Marine13 (Reimer et al., 2013) |
| MD95-2010 | 136-137                    | <b>13250</b>                            | 60             | ?                                          | KIA 6552    | <b>15306,5</b>    | Calib 7.1.0 / Marine13 (Reimer et al., 2013) |
| MD95-2010 | 173-174                    | <b>14750</b>                            | 110            | ?                                          | KIA 6553    | <b>17474,5</b>    | Calib 7.1.0 / Marine13 (Reimer et al., 2013) |
| MD95-2010 | 197-198                    | <b>15620</b>                            | 70             | ?                                          | KIA 6554    | <b>18483,5</b>    | Calib 7.1.0 / Marine13 (Reimer et al., 2013) |
| MD95-2010 | 300-301                    | <b>16990</b>                            | 110            | ?                                          | KIA 6555    | <b>20010</b>      | Calib 7.1.0 / Marine13 (Reimer et al., 2013) |
| MD95-2010 | 449-450                    | <b>19830</b>                            | 130            | ?                                          | GifA 96476  | <b>23382,5</b>    | Calib 7.1.0 / Marine13 (Reimer et al., 2013) |
| MD95-2010 | 459-460                    | <b>19930</b>                            | 120            | ?                                          | GifA 96487  | <b>23529,5</b>    | Calib 7.1.0 / Marine13 (Reimer et al., 2013) |
| MD95-2010 | 469-470                    | <b>20340</b>                            | 130            | ?                                          | GifA 96490  | <b>23988,5</b>    | Calib 7.1.0 / Marine13 (Reimer et al., 2013) |

|           |           |              |     |                                    |             |                |                                              |
|-----------|-----------|--------------|-----|------------------------------------|-------------|----------------|----------------------------------------------|
| MD95-2010 | 470-471   | <b>20390</b> | 160 | ?                                  | GifA 96684  | <b>24048,5</b> | Calib 7.1.0 / Marine13 (Reimer et al., 2013) |
| MD95-2010 | 521-522   | <b>21590</b> | 190 | ?                                  | GifA 96685  | <b>25525</b>   | Calib 7.1.0 / Marine13 (Reimer et al., 2013) |
| MD95-2010 | 600       |              |     | GI3 termination (duration 0.3 ka)  |             | <b>27430</b>   | (Wolff et al., 2010) (GICC05 age scale)      |
| MD95-2010 | 610       |              |     | GI3 onset                          |             | <b>27730</b>   | (Wolff et al., 2010) (GICC05 age scale)      |
| MD95-2010 | 620       |              |     | GI4 termination (duration 0.3 ka)  |             | <b>28550</b>   | (Wolff et al., 2010) (GICC05 age scale)      |
| MD95-2010 | 630       |              |     | GI4 onset                          |             | <b>28850</b>   | (Wolff et al., 2010) (GICC05 age scale)      |
| MD95-2010 | 640-641   | <b>25520</b> | 240 | ?                                  | KIA 6557    | <b>29151,5</b> | Calib 7.1.0 / Marine13 (Reimer et al., 2013) |
| MD95-2010 | 670-671   | <b>27450</b> | 200 | ?                                  | GifA 96496  | <b>31077,5</b> | Calib 7.1.0 / Marine13 (Reimer et al., 2013) |
| MD95-2010 | 708       |              |     | GI5 termination (duration 0.5 ka)  |             | <b>31950</b>   | (Wolff et al., 2010) (GICC05 age scale)      |
| MD95-2010 | 720       |              |     | GI5 onset                          |             | <b>32450</b>   | (Wolff et al., 2010) (GICC05 age scale)      |
| MD95-2010 | 728       |              |     | GI6 termination (duration 0.4 ka)  |             | <b>33290</b>   | (Wolff et al., 2010) (GICC05 age scale)      |
| MD95-2010 | 736-738   | <b>29670</b> | 260 | ?                                  | GifA 96687  | <b>33480</b>   | Calib 7.1.0 / Marine13 (Reimer et al., 2013) |
| MD95-2010 | 740       |              |     | GI6 onset                          |             | <b>33690</b>   | (Wolff et al., 2010) (GICC05 age scale)      |
| MD95-2010 | 752       |              |     | GI7 termination (duration 0.7 ka)  |             | <b>34730</b>   | (Wolff et al., 2010) (GICC05 age scale)      |
| MD95-2010 | 765       |              |     | GI7 onset                          |             | <b>35430</b>   | (Wolff et al., 2010) (GICC05 age scale)      |
| MD95-2010 | 784       |              |     | GI8 termination (duration 1.6 ka)  |             | <b>36570</b>   | (Wolff et al., 2010) (GICC05 age scale)      |
| MD95-2010 | 790-791   | <b>33420</b> | 370 | ?                                  | GifA 96494  | <b>37120</b>   | Calib 7.1.0 / Marine13 (Reimer et al., 2013) |
| MD95-2010 | 802       |              |     | GI8 onset                          |             | <b>38170</b>   | (Wolff et al., 2010) (GICC05 age scale)      |
| MD95-2010 | 820       |              |     | GI9 termination (duration 0.3 ka)  |             | <b>39810</b>   | (Wolff et al., 2010) (GICC05 age scale)      |
| MD95-2010 | 830       |              |     | GI9 onset                          |             | <b>40110</b>   | (Wolff et al., 2010) (GICC05 age scale)      |
| MD95-2010 | 840       |              |     | GI10 termination (duration 0.7 ka) |             | <b>40710</b>   | (Wolff et al., 2010) (GICC05 age scale)      |
| MD95-2010 | 864       |              |     | GI10 onset                         |             | <b>41410</b>   | (Wolff et al., 2010) (GICC05 age scale)      |
| MD95-2010 | 870       |              |     | GI11 termination (duration 1 ka)   |             | <b>42290</b>   | (Wolff et al., 2010) (GICC05 age scale)      |
| MD95-2010 | 889       |              |     | GI11 onset                         |             | <b>43290</b>   | (Wolff et al., 2010) (GICC05 age scale)      |
| MD95-2010 | 894       |              |     | GI12 termination (duration 2,6 ka) |             | <b>44210</b>   | (Wolff et al., 2010) (GICC05 age scale)      |
| MD95-2010 | 934       |              |     | GI12 onset                         |             | <b>46810</b>   | (Wolff et al., 2010) (GICC05 age scale)      |
| MD95-2010 | 954       |              |     | GI13 onset                         |             | <b>49230</b>   | (Wolff et al., 2010) (GICC05 age scale)      |
| MD95-2010 | 996       |              |     | GI14 onset                         |             | <b>54170</b>   | (Wolff et al., 2010) (GICC05 age scale)      |
| MD95-2010 | 1000-1001 |              |     | Ash-layer II - base                |             | <b>55380</b>   | (Wolff et al., 2010) (GICC05 age scale)      |
| MD95-2010 | 1072-1073 |              |     | Marine isotope event 4.0           |             | <b>59000</b>   | (Martinson et al., 1987) (SPECMAP)           |
| MD99-2281 | 40        | <b>10260</b> | 100 | <i>G. bulloides</i>                | GifA 100405 | <b>11276,5</b> | Calib 7.1.0 / Marine13 (Reimer et al., 2013) |
| MD99-2281 | 270       | <b>10800</b> | 100 | <i>G. bulloides</i>                | GifA 100407 | <b>12276,5</b> | Calib 7.1.0 / Marine13 (Reimer et al., 2013) |
| MD99-2281 | 400       | <b>11060</b> | 110 | <i>G. bulloides</i>                | GifA 100408 | <b>12592,5</b> | Calib 7.1.0 / Marine13 (Reimer et al., 2013) |
| MD99-2281 | 510       | <b>15290</b> | 130 | <i>N. pachyderma s</i>             | GifA 100409 | <b>18111</b>   | Calib 7.1.0 / Marine13 (Reimer et al., 2013) |
| MD99-2281 | 580       | <b>15760</b> | 170 | <i>N. pachyderma s</i>             | GifA 100410 | <b>18617</b>   | Calib 7.1.0 / Marine13 (Reimer et al., 2013) |
| MD99-2281 | 650       | <b>16040</b> | 140 | <i>N. pachyderma s</i>             | GifA 100411 | <b>18882,5</b> | Calib 7.1.0 / Marine13 (Reimer et al., 2013) |
| MD99-2281 | 780       | <b>18060</b> | 160 | <i>N. pachyderma s</i>             | GifA 100412 | <b>21342</b>   | Calib 7.1.0 / Marine13 (Reimer et al., 2013) |
| MD99-2281 | 1240      |              |     | GI3 termination (duration 0.3 ka)  |             | <b>27430</b>   | (Wolff et al., 2010) (GICC05 age scale)      |
| MD99-2281 | 1275      |              |     | GI3 onset                          |             | <b>27730</b>   | (Wolff et al., 2010) (GICC05 age scale)      |
| MD99-2281 | 1280      | <b>24210</b> | 140 | <i>N. pachyderma s</i>             | SacA 19117  | <b>27852,5</b> | Calib 7.1.0 / Marine13 (Reimer et al., 2013) |
| MD99-2281 | 1300      |              |     | GI4 termination (duration 0.3 ka)  |             | <b>28550</b>   | (Wolff et al., 2010) (GICC05 age scale)      |
| MD99-2281 | 1355      |              |     | GI4 onset                          |             | <b>28850</b>   | (Wolff et al., 2010) (GICC05 age scale)      |
| MD99-2281 | 1430      | <b>27430</b> | 140 | <i>N. pachyderma s</i>             | SacA 19118  | <b>31068,5</b> | Calib 7.1.0 / Marine13 (Reimer et al., 2013) |
| MD99-2281 | 1440      | <b>27940</b> | 140 | <i>N. pachyderma s</i>             | SacA 19119  | <b>31322</b>   | Calib 7.1.0 / Marine13 (Reimer et al., 2013) |

|           |       |              |     |                                    |            |                |                                              |
|-----------|-------|--------------|-----|------------------------------------|------------|----------------|----------------------------------------------|
| MD99-2281 | 1475  |              |     | GI5 termination (duration 0.5 ka)  |            | <b>31950</b>   | (Wolff et al., 2010) (GICC05 age scale)      |
| MD99-2281 | 1523  |              |     | GI5 onset                          |            | <b>32450</b>   | (Wolff et al., 2010) (GICC05 age scale)      |
| MD99-2281 | 1548  |              |     | GI6 termination (duration 0.4 ka)  |            | <b>33290</b>   | (Wolff et al., 2010) (GICC05 age scale)      |
| MD99-2281 | 1605  |              |     | GI6 onset                          |            | <b>33690</b>   | (Wolff et al., 2010) (GICC05 age scale)      |
| MD99-2281 | 1650  |              |     | GI7 termination (duration 0.7 ka)  |            | <b>34730</b>   | (Wolff et al., 2010) (GICC05 age scale)      |
| MD99-2281 | 1711  |              |     | GI7 onset                          |            | <b>35430</b>   | (Wolff et al., 2010) (GICC05 age scale)      |
| MD99-2281 | 1755  |              |     | GI8 termination (duration 1.6 ka)  |            | <b>36570</b>   | (Wolff et al., 2010) (GICC05 age scale)      |
| MD99-2281 | 1880  |              |     | GI8 onset                          |            | <b>38170</b>   | (Wolff et al., 2010) (GICC05 age scale)      |
| MD99-2281 | 1930  |              |     | GI9 termination (duration 0.3 ka)  |            | <b>39810</b>   | (Wolff et al., 2010) (GICC05 age scale)      |
| MD99-2281 | 1960  |              |     | GI9 onset                          |            | <b>40110</b>   | (Wolff et al., 2010) (GICC05 age scale)      |
| MD99-2281 | 2030  |              |     | GI10 termination (duration 0.7 ka) |            | <b>40710</b>   | (Wolff et al., 2010) (GICC05 age scale)      |
| MD99-2281 | 2090  |              |     | GI10 onset                         |            | <b>41410</b>   | (Wolff et al., 2010) (GICC05 age scale)      |
| MD99-2281 | 2110  |              |     | GI11 termination (duration 1 ka)   |            | <b>42290</b>   | (Wolff et al., 2010) (GICC05 age scale)      |
| MD99-2281 | 2170  |              |     | GI11 onset                         |            | <b>43290</b>   | (Wolff et al., 2010) (GICC05 age scale)      |
| MD99-2285 | 1,5   | <b>3005</b>  | 30  | Bulk planktonic foraminifera       | SacA 31203 | <b>2769</b>    | Calib 7.1.0 / Marine13 (Reimer et al., 2013) |
| MD99-2285 | 70,5  | <b>10335</b> | 40  | <i>N. pachyderma</i> (s)           | SacA 37852 | <b>11318,5</b> | Calib 7.1.0 / Marine13 (Reimer et al., 2013) |
| MD99-2285 | 136,5 | <b>13160</b> | 45  | <i>N. pachyderma</i> (s)           | SacA 31207 | <b>15197</b>   | Calib 7.1.0 / Marine13 (Reimer et al., 2013) |
| MD99-2285 | 175   | <b>14480</b> | 50  | <i>N. pachyderma</i> (s)           | SacA 31204 | <b>17110,5</b> | Calib 7.1.0 / Marine13 (Reimer et al., 2013) |
| MD99-2285 | 200   | <b>15730</b> | 50  | <i>N. pachyderma</i> (s)           | SacA 37854 | <b>18607,5</b> | Calib 7.1.0 / Marine13 (Reimer et al., 2013) |
| MD99-2285 | 213   | <b>16410</b> | 50  | <i>N. pachyderma</i> (s)           | SacA 31205 | <b>19319,5</b> | Calib 7.1.0 / Marine13 (Reimer et al., 2013) |
| MD99-2285 | 260   | <b>19850</b> | 200 | <i>N. pachyderma</i> (s)           | SacA 37855 | <b>23395,5</b> | Calib 7.1.0 / Marine13 (Reimer et al., 2013) |
| MD99-2285 | 275   | <b>20510</b> | 90  | <i>N. pachyderma</i> (s)           | SacA 37856 | <b>24171</b>   | Calib 7.1.0 / Marine13 (Reimer et al., 2013) |
| MD99-2285 | 294   | <b>22180</b> | 100 | <i>N. pachyderma</i> (s)           | SacA 37857 | <b>25997,5</b> | Calib 7.1.0 / Marine13 (Reimer et al., 2013) |
| MD99-2285 | 325   |              |     | GI3 termination (duration 0.3 ka)  |            | <b>27430</b>   | (Wolff et al., 2010) (GICC05 age scale)      |
| MD99-2285 | 332   |              |     | GI3 onset                          |            | <b>27730</b>   | (Wolff et al., 2010) (GICC05 age scale)      |
| MD99-2285 | 337   |              |     | GI4 termination (duration 0.3 ka)  |            | <b>28550</b>   | (Wolff et al., 2010) (GICC05 age scale)      |
| MD99-2285 | 349   |              |     | GI4 onset                          |            | <b>28850</b>   | (Wolff et al., 2010) (GICC05 age scale)      |
| MD99-2285 | 386   |              |     | GI6 termination (duration 0.4 ka)  |            | <b>33290</b>   | (Wolff et al., 2010) (GICC05 age scale)      |
| MD99-2285 | 406   |              |     | GI6 onset                          |            | <b>33690</b>   | (Wolff et al., 2010) (GICC05 age scale)      |
| MD99-2285 | 419   |              |     | GI7 termination (duration 0.7 ka)  |            | <b>34730</b>   | (Wolff et al., 2010) (GICC05 age scale)      |
| MD99-2285 | 441   |              |     | GI7 onset                          |            | <b>35430</b>   | (Wolff et al., 2010) (GICC05 age scale)      |
| MD99-2285 | 457   |              |     | GI8 termination (duration 1.6 ka)  |            | <b>36570</b>   | (Wolff et al., 2010) (GICC05 age scale)      |
| MD99-2285 | 489   |              |     | GI8 onset                          |            | <b>38170</b>   | (Wolff et al., 2010) (GICC05 age scale)      |
| MD99-2285 | 535   |              |     | GI9 termination (duration 0.3 ka)  |            | <b>39810</b>   | (Wolff et al., 2010) (GICC05 age scale)      |
| MD99-2285 | 552   |              |     | GI9 onset                          |            | <b>40110</b>   | (Wolff et al., 2010) (GICC05 age scale)      |
| MD99-2285 | 590   |              |     | GI10 termination (duration 0.7 ka) |            | <b>40710</b>   | (Wolff et al., 2010) (GICC05 age scale)      |
| MD99-2285 | 621   |              |     | GI10 onset                         |            | <b>41410</b>   | (Wolff et al., 2010) (GICC05 age scale)      |
| MD99-2285 | 664   |              |     | GI11 termination (duration 1 ka)   |            | <b>42290</b>   | (Wolff et al., 2010) (GICC05 age scale)      |
| MD99-2285 | 730   |              |     | GI11 onset                         |            | <b>43290</b>   | (Wolff et al., 2010) (GICC05 age scale)      |
| MD99-2285 | 750   |              |     | GI12 termination (duration 2,6 ka) |            | <b>44210</b>   | (Wolff et al., 2010) (GICC05 age scale)      |
| MD99-2285 | 810   |              |     | GI12 onset                         |            | <b>46810</b>   | (Wolff et al., 2010) (GICC05 age scale)      |
| MD99-2285 | 850   |              |     | GI13 onset                         |            | <b>49230</b>   | (Wolff et al., 2010) (GICC05 age scale)      |

\* Uncorrected AMS<sup>14</sup>C dates are from Manthé (1998) for core MD95-2009, Dokken and Jansen (1999) for core MD95-2010, Zumaque et al. (2012) and Caulle et al. (2013) for core MD99-2281, and Wary et al. (2016) for core MD99-2285.

\*\* Lab. id.: KIA – Tandetron AMS facility at Kiel Leibniz Laboratory (Germany); GifA – Tandetron AMS facility at Gif-Sur-Yvette (France); SacA– ARTEMIS Tandetron AMS facility at Saclay (France).
